# Supplementary material for: Food Insecurity Reduces the Chance of Following a Nutrient-Dense Dietary Pattern by Brazilian Adults: Insights from a Nationwide Cross-Sectional Survey
Source: MDPI journal article supplement (doi:10.3390/nu14102126), 2022-05-19

## **Nutrients – Supplementary Material**

### **Food insecurity reduces the chance of following a nutrient-dense dietary pattern by**

#### **Brazilian adults: insights from a nationwide cross-sectional survey**

Michelle Alessandra de Castro, Mariane de Mello Fontanelli, Carlos Alberto Nogueira-de-Almeida, Mauro Fisberg

## **Contents**

|                                                                                                                                                                                       |   |
|---------------------------------------------------------------------------------------------------------------------------------------------------------------------------------------|---|
| <b>Table S1.</b> Description of the forty-seven food groups composition used to derive dietary patterns based on the Household Budget Survey, 2017-2018, Brazil. ....                 | 2 |
| <b>Table S2.</b> Characteristics of the Brazilian adult population (n=28,153) according to clusters of adherence to dietary patterns, Household Budget Survey 2017-2018, Brazil. .... | 4 |
| <b>Figure S1.</b> Scree plot of eigenvalues from the exploratory factor analysis (EFA) with principal component extraction method (PCF) and Varimax orthogonal rotation. ....         | 7 |

**Table S1.** Description of the forty-seven food groups composition used to derive dietary patterns based on the Household Budget Survey, 2017-2018, Brazil.

| Food groups                            | Food items                                                                                                                                        |
|----------------------------------------|---------------------------------------------------------------------------------------------------------------------------------------------------|
| White rice                             | Cooked white rice                                                                                                                                 |
| Beans                                  | Brown beans, black beans, pinto beans                                                                                                             |
| Red meat                               | Steak beef, ground beef, beef ribs, pork chop, pork ribs, pork loin (all cooking methods)                                                         |
| Water                                  | Water tap, bottled water, mineral water, sparkling water                                                                                          |
| Coffee                                 | Brew coffee, instant coffee, cappuccino, decaffeinated coffee, espresso coffee                                                                    |
| Table sugar                            | White sugar, demerara sugar, brown sugar, honey, molasses                                                                                         |
| Leafy and non-leafy vegetables         | Lettuce, kale, escarole, spinach, cabbage, watercress, chard, arugula, tomato, carrot, beet, chayote, cucumber, eggplant, okra, pumpkin, zucchini |
| Corn                                   | Boiled corn, grits, sweet corn mush, hominy                                                                                                       |
| Cake (without fillings and toppings)   | White cake, chocolate cake, cornmeal cake, orange cake, carrot cake, sponge cake (regular, diet, light)                                           |
| Cowpea beans                           | Cooked/boiled cowpea beans                                                                                                                        |
| Sausages and Cold cuts                 | Sausages, frankfurters, ham, mortadella, salami, roast beef                                                                                       |
| Organs meats                           | Liver, intestine, kidney, stomach (pork, beef and poultry)                                                                                        |
| Industrialized and Sweetened beverages | Industrialized fruit juices, sugar cane beverage, energetic drinks, isotonic drinks                                                               |
| Poultry                                | Chicken, turkey, duck, mallard, goose (all cooking methods)                                                                                       |
| Alcoholic beverages                    | Beer, wine, spirits, cognac, champagne, vodka, liquor                                                                                             |
| Tea                                    | Herbal tea (brewed or instant)                                                                                                                    |
| Olive and vegetable oils               | Extra virgin olive oil, virgin olive oil, soybean oil, cottonseed oil, sunflower oil, canola oil, corn oil                                        |
| Canned vegetables                      | Olives, canned peas, canned corn, sauerkraut, canned hearts of palm, mushrooms                                                                    |
| Natural juices                         | Natural fruit juices, beet juice, carrot juice, kale juice, mixed juice of fruits and vegetables                                                  |
| Roots and tubers                       | Potato, sweet potatoes, cassava, yam (all cooking methods)                                                                                        |
| Other legumes                          | Cooked soybeans, lentils, chickpeas, snow peas                                                                                                    |
| Bacon and Jerky beef                   | Bacon, jerky beef, salted meat                                                                                                                    |
| Cookies and Crackers                   | Cookies with or without fillings or toppings, crackers                                                                                            |
| Chocolate milk powder                  | Chocolate milk powder, regular (different brands)                                                                                                 |
| Soda pop                               | Coke, Diet Coke, Orange soda, Lemon soda, Guaraná soda                                                                                            |
| White breads and Toasts                | French bread, Italian bread, loaf bread, buns, toasts                                                                                             |
| Butter and Margarine                   | Butter and margarine (salted and unsalted, regular or light)                                                                                      |
| Pasta                                  | Cooked noodles, gnocchi, lasagna, cannelloni, ravioli                                                                                             |

|                                                                            |                                                                                                                             |
|----------------------------------------------------------------------------|-----------------------------------------------------------------------------------------------------------------------------|
| Popcorn                                                                    | Popcorn (sweet, salty, light)                                                                                               |
| Salty snacks                                                               | Potatoes chips, corn chips                                                                                                  |
| Sweets and Candies                                                         | Cakes with fillings or toppings, sweet pies, milk candy, chocolate pudding, peanut brittle, ice cream                       |
| Salty pastries and pies                                                    | Esfiha, croquette, croissant, Italian focaccia, chicken pie, cheese pie, quiche, fried pastry                               |
| Eggs                                                                       | Chicken eggs, quail eggs (all cooking methods)                                                                              |
| Fish and Seafood                                                           | Fish, shrimps, crab, oyster, lobster, squid, octopus, canned sardine, canned tuna                                           |
| Sandwiches                                                                 | Hot dog, hamburger sandwich, cold cuts sandwiches, wrap, bruschetta                                                         |
| Flours                                                                     | Corn flour, tapioca flour                                                                                                   |
| Nuts and Seeds                                                             | Cashew nuts, peanut, Brazilian nuts, almonds, walnut, pecan, pistachio, flaxseeds, pumpkin seeds, sesame                    |
| Sauces and spices                                                          | Tomato sauce, white sauce, tartar sauce, mustard sauce, ketchup, mayonnaise, salad dressing, salt, vinegar                  |
| Pizza                                                                      | Calabreza pizza, Pepperoni pizza, Mozzarella pizza, Margherita pizza, Vegetarian pizza                                      |
| Mixed dishes (with cereals, beans, legumes, meat and/or other ingredients) | Yakisoba, Brazilian Black Beans Stew (Feijoada), rice with chicken, risotto, grits with ground beef, potato salad with tuna |
| Other cereals and grains                                                   | Oatmeal, oat flakes, quinoa, corn flakes, granola, wheat bran                                                               |
| Brown rice                                                                 | Cooked brown rice, Three grain rice, Seven grain rice                                                                       |
| Soups                                                                      | Soups with or without beans, noodles, rice, corn meal and vegetables; instant soups                                         |
| Whole breads and Toasts                                                    | Whole wheat bread (regular, diet or light), rye bread, whole wheat toast (regular, diet or light), rye toast                |
| Artificial sweeteners                                                      | Artificial sweeteners (liquid or powder, not specified)                                                                     |
| Fruits                                                                     | Fresh fruits, fruit salad, coconut                                                                                          |
| Dairy products                                                             | Milk (whole, low-fat, skimmed), yogurt, cheese (white and yellow), dairy beverages, Kefir, milk smoothie                    |

---

**Table S2.** Characteristics of the Brazilian adult population (n=28,153) according to clusters of adherence to dietary patterns, Household Budget Survey 2017-2018, Brazil.

| Characteristics                          | Cluster 1 (n=4,098) |                |               | Cluster 2 (n=13,346) |                |               | Cluster 3 (n=6,050) |                |               | Cluster 4 (n=4,659) |                |               | p-value <sup>b</sup> |
|------------------------------------------|---------------------|----------------|---------------|----------------------|----------------|---------------|---------------------|----------------|---------------|---------------------|----------------|---------------|----------------------|
| Characteristics of the household members | n                   | % <sup>a</sup> | 95% CI        | n                    | % <sup>a</sup> | 95% CI        | n                   | % <sup>a</sup> | 95% CI        | n                   | % <sup>a</sup> | 95% CI        |                      |
| Age group, years                         |                     |                |               |                      |                |               |                     |                |               |                     |                |               |                      |
| 20-29                                    | 694                 | 11.99          | (10.61-13.52) | 2,896                | 37.4           | (35.44-39.41) | 1501                | 22.7           | (20.97-24.52) | 1574                | 27.91          | (25.93-29.98) | <0.001               |
| 30-39                                    | 992                 | 15.41          | (14.05-16.87) | 3,551                | 40.74          | (38.78-42.73) | 1735                | 23.31          | (21.72-24.97) | 1320                | 20.55          | (18.71-22.51) |                      |
| 40-49                                    | 1,133               | 17.55          | (15.96-19.26) | 3,607                | 43.22          | (41.35-45.11) | 1491                | 21.97          | (20.47-23.55) | 1043                | 17.26          | (15.73-18.9)  |                      |
| 50-59                                    | 1,279               | 21.83          | (20.16-23.6)  | 3,292                | 43.19          | (41.3-45.09)  | 1323                | 22.22          | (20.6-23.93)  | 722                 | 12.77          | (11.45-14.22) |                      |
| Sex                                      |                     |                |               |                      |                |               |                     |                |               |                     |                |               |                      |
| Male                                     | 1,432               | 12.6           | (11.57-13.7)  | 6,215                | 39.8           | (38.41-41.21) | 3300                | 25.62          | (24.38-26.91) | 2391                | 21.98          | (20.73-23.29) | <0.001               |
| Female                                   | 2,666               | 20.47          | (19.34-21.66) | 7,131                | 42.35          | (40.99-43.73) | 2750                | 19.54          | (18.45-20.68) | 2268                | 17.63          | (16.54-18.77) |                      |
| Ethnicity <sup>d</sup>                   |                     |                |               |                      |                |               |                     |                |               |                     |                |               |                      |
| White and yellow                         | 2,180               | 23.09          | (21.44-24.83) | 3,972                | 32.74          | (31.16-34.36) | 2099                | 20.22          | (18.91-21.59) | 2245                | 23.95          | (22.49-25.47) | <0.001               |
| Black, brown and indigenous              | 1,910               | 11.55          | (10.76-12.4)  | 9,367                | 47.45          | (46.04-48.85) | 3947                | 24.36          | (23.18-25.58) | 2412                | 16.64          | (15.49-17.87) |                      |
| Education level, years                   |                     |                |               |                      |                |               |                     |                |               |                     |                |               |                      |
| 0-4                                      | 286                 | 6.95           | (5.8-8.3)     | 2769                 | 64.24          | (61.71-66.69) | 841                 | 22.03          | (20.06-24.14) | 247                 | 6.78           | (5.56-8.24)   | <0.001               |
| 5-9                                      | 916                 | 11.25          | (10.04-12.57) | 4529                 | 48.62          | (46.81-50.42) | 1,991               | 25.46          | (23.88-27.12) | 1,123               | 14.67          | (13.41-16.03) |                      |
| 10-12                                    | 1343                | 14.52          | (13.33-15.79) | 4331                 | 37.42          | (35.79-39.07) | 2,371               | 25.15          | (23.67-26.68) | 1,976               | 22.92          | (21.39-24.52) |                      |
| ≥13                                      | 1553                | 31.45          | (29-34.01)    | 1717                 | 25.78          | (23.79-27.89) | 847                 | 15.04          | (13.43-16.8)  | 1,313               | 27.73          | (25.46-30.12) |                      |
| Lifestyle characteristics                |                     |                |               |                      |                |               |                     |                |               |                     |                |               |                      |
| Body mass index <sup>f</sup>             |                     |                |               |                      |                |               |                     |                |               |                     |                |               |                      |
| Underweight                              | 77                  | 13.93          | (9.77-19.49)  | 297                  | 42.88          | (35.89-50.17) | 131                 | 24.88          | (19.13-31.69) | 99                  | 18.31          | (13.99-23.59) | 0.412                |
| Healthy weight                           | 1,656               | 15.92          | (14.74-17.18) | 5805                 | 40.85          | (39.32-42.4)  | 2613                | 22.9           | (21.56-24.29) | 1995                | 20.33          | (18.95-21.79) |                      |
| Overweight                               | 1,623               | 16.78          | (15.54-18.09) | 4970                 | 40.74          | (39.09-42.41) | 2370                | 22.68          | (21.34-24.08) | 1762                | 19.8           | (18.38-21.29) |                      |
| Obese                                    | 742                 | 17.98          | (16-20.15)    | 2271                 | 42.22          | (39.99-44.48) | 936                 | 21.18          | (19.33-23.14) | 803                 | 18.63          | (16.93-20.45) |                      |
| Followed a specific diet                 |                     |                |               |                      |                |               |                     |                |               |                     |                |               |                      |
| Yes                                      | 1,280               | 38.76          | (36.2-41.39)  | 1705                 | 38.66          | (36.22-41.16) | 399                 | 11.03          | (9.64-12.58)  | 394                 | 11.55          | (9.82-13.54)  | <0.001               |
| No                                       | 2,818               | 13.21          | (12.31-14.16) | 11641                | 41.45          | (40.22-42.69) | 5651                | 24.31          | (23.28-25.37) | 4265                | 21.04          | (19.97-22.15) |                      |
| Food variety score <sup>g</sup>          |                     |                |               |                      |                |               |                     |                |               |                     |                |               |                      |
| Tertile 1 (2-10 food items)              | 670                 | 6.2            | (5.51-6.97)   | 8016                 | 57.9           | (56.07-59.72) | 2193                | 19.49          | (18.17-20.89) | 1560                | 16.4           | (14.89-18.03) | <0.001               |

|                                                        |       |       |               |       |       |               |      |       |               |      |       |               |        |
|--------------------------------------------------------|-------|-------|---------------|-------|-------|---------------|------|-------|---------------|------|-------|---------------|--------|
| Tertile 2 (11-12 food items)                           | 938   | 14.12 | (12.82-15.53) | 3395  | 39.05 | (37.17-40.96) | 1957 | 27.29 | (25.57-29.09) | 1224 | 19.54 | (17.74-21.47) |        |
| Tertile 3 (13 food items)                              | 2,490 | 32.89 | (30.97-34.87) | 1935  | 19.66 | (18.42-20.96) | 1900 | 22.76 | (21.31-24.26) | 1875 | 24.69 | (23.13-26.32) |        |
| Number of meals                                        |       |       |               |       |       |               |      |       |               |      |       |               |        |
| 1-3                                                    | 155   | 6.4   | (4.99-8.16)   | 1,642 | 53.14 | (49.07-57.18) | 504  | 17.24 | (14.74-20.06) | 487  | 23.22 | (19.53-27.38) | <0.001 |
| 4-6                                                    | 2,324 | 15.53 | (14.42-16.71) | 8,291 | 40.5  | (39.15-41.87) | 3991 | 23.6  | (22.4-24.84)  | 2996 | 20.36 | (19.15-21.63) |        |
| ≥ 7                                                    | 1,619 | 23.57 | (21.95-25.27) | 3,413 | 37.36 | (35.53-39.24) | 1555 | 22.21 | (20.68-23.83) | 1176 | 16.85 | (15.42-18.39) |        |
| Main meals                                             |       |       |               |       |       |               |      |       |               |      |       |               |        |
| 3                                                      | 3,407 | 16.97 | (15.95-18.04) | 10921 | 41.14 | (39.9-42.39)  | 5283 | 24.15 | (23.09-25.24) | 3448 | 17.74 | (16.74-18.77) | <0.001 |
| 2                                                      | 663   | 16.04 | (14.35-17.89) | 2205  | 40.87 | (38.47-43.31) | 731  | 17.45 | (15.67-19.39) | 1062 | 25.64 | (23.5-27.9)   |        |
| ≤ 1                                                    | 28    | 4.74  | (2.82-7.86)   | 220   | 40.66 | (31.42-50.61) | 36   | 7.03  | (4.29-11.3)   | 149  | 47.57 | (36.67-58.71) |        |
| Subjective evaluation of the standard of living - diet |       |       |               |       |       |               |      |       |               |      |       |               |        |
| Good                                                   | 2,834 | 19.67 | (18.36-21.04) | 7192  | 37.64 | (36.15-39.16) | 3307 | 20.94 | (19.77-22.16) | 3045 | 21.75 | (20.42-23.15) | <0.001 |
| Satisfactory                                           | 1,156 | 12.63 | (11.33-14.05) | 5205  | 45.38 | (43.51-47.27) | 2400 | 24.94 | (23.38-26.55) | 1450 | 17.06 | (15.52-18.71) |        |
| Bad                                                    | 108   | 7.18  | (5.29-9.68)   | 949   | 51.7  | (47.59-55.79) | 343  | 25.49 | (22.01-29.31) | 164  | 15.62 | (12.17-19.83) |        |
| <i>Household characteristics</i>                       |       |       |               |       |       |               |      |       |               |      |       |               |        |
| Area                                                   |       |       |               |       |       |               |      |       |               |      |       |               |        |
| Urban                                                  | 3,426 | 17.75 | (16.7-18.85)  | 9444  | 37.79 | (36.54-39.05) | 5011 | 23.04 | (22-24.12)    | 3982 | 21.43 | (20.3-22.6)   | <0.001 |
| Rural                                                  | 672   | 9.02  | (7.93-10.26)  | 3902  | 61.86 | (59.39-64.26) | 1039 | 19.61 | (17.66-21.71) | 677  | 9.51  | (8.52-10.6)   |        |
| Region                                                 |       |       |               |       |       |               |      |       |               |      |       |               |        |
| North                                                  | 287   | 8.06  | (6.48-9.97)   | 2610  | 57.41 | (53.88-60.86) | 816  | 23.46 | (20.43-26.78) | 419  | 11.08 | (9.12-13.39)  | <0.001 |
| Northeast                                              | 1,092 | 10.95 | (9.99-11.99)  | 4896  | 49.26 | (47.54-50.99) | 2528 | 27.02 | (25.5-28.59)  | 1201 | 12.77 | (11.74-13.88) |        |
| Southeast                                              | 1,224 | 19.53 | (17.69-21.51) | 2999  | 36.77 | (34.73-38.85) | 1661 | 23.31 | (21.58-25.15) | 1145 | 20.39 | (18.47-22.45) |        |
| South                                                  | 879   | 21.94 | (19.99-24.03) | 952   | 24.18 | (21.8-26.73)  | 623  | 17.55 | (15.76-19.49) | 1245 | 36.33 | (34-38.72)    |        |
| Midwest                                                | 616   | 17.97 | (15.76-20.42) | 1889  | 51.46 | (48.54-54.37) | 422  | 12.09 | (10.5-13.88)  | 649  | 18.48 | (16.31-20.88) |        |
| Family income per capita <sup>c</sup>                  |       |       |               |       |       |               |      |       |               |      |       |               |        |
| ≤ 1 minimum wage                                       | 861   | 6.61  | (5.92-7.37)   | 7744  | 54.66 | (52.91-56.39) | 3241 | 26.93 | (25.47-28.44) | 1372 | 11.8  | (10.8-12.88)  | <0.001 |
| > 1 and ≤ 3 minimum wages                              | 2,091 | 18.85 | (17.42-20.37) | 4749  | 35.19 | (33.63-36.79) | 2405 | 22.39 | (21.03-23.81) | 2417 | 23.56 | (22.02-25.18) |        |
| >3 minimum wages                                       | 1,146 | 35.69 | (32.29-39.23) | 853   | 22.62 | (20.04-25.43) | 404  | 11.87 | (9.99-14.06)  | 870  | 29.82 | (26.6-33.25)  |        |
| Number of household members                            |       |       |               |       |       |               |      |       |               |      |       |               |        |
| ≤ 3 members                                            | 2,615 | 19.63 | (18.41-20.91) | 6615  | 38.44 | (37.1-39.79)  | 2926 | 20.75 | (19.53-22.01) | 2608 | 21.19 | (19.89-22.55) | <0.001 |
| 4 to 6 members                                         | 1,398 | 13.88 | (12.48-15.41) | 5858  | 42.86 | (40.92-44.83) | 2773 | 24.52 | (23.04-26.06) | 1901 | 18.73 | (17.16-20.41) |        |
| ≥ 7 members                                            | 85    | 5.25  | (3.65-7.49)   | 873   | 55.61 | (50.28-60.82) | 351  | 25.85 | (21.22-31.09) | 150  | 13.29 | (9.83-17.73)  |        |

|                                                          |       |       |               |        |       |               |      |       |               |      |       |               |        |
|----------------------------------------------------------|-------|-------|---------------|--------|-------|---------------|------|-------|---------------|------|-------|---------------|--------|
| Members < 5 years                                        |       |       |               |        |       |               |      |       |               |      |       |               |        |
| Yes                                                      | 514   | 10.06 | (8.78-11.5)   | 2829   | 44.03 | (41.53-46.57) | 1363 | 25.17 | (23.14-27.32) | 962  | 20.74 | (18.41-23.28) | <0.001 |
| No                                                       | 3,584 | 18.17 | (17.09-19.3)  | 10517  | 40.35 | (39.1-41.61)  | 4687 | 21.92 | (20.89-23)    | 3697 | 19.56 | (18.47-20.7)  |        |
| Members > 60 years                                       |       |       |               |        |       |               |      |       |               |      |       |               |        |
| Yes                                                      | 799   | 17.3  | (15.43-19.34) | 2,472  | 40.83 | (38.47-43.22) | 1176 | 24.29 | (22.23-26.48) | 724  | 17.59 | (15.64-19.71) | 0.063  |
| No                                                       | 3,299 | 16.4  | (15.4-17.45)  | 10,874 | 41.14 | (39.86-42.42) | 4874 | 22.2  | (21.18-23.26) | 3935 | 20.26 | (19.16-21.42) |        |
| Sex of the household reference person                    |       |       |               |        |       |               |      |       |               |      |       |               |        |
| Male                                                     | 2,503 | 16.62 | (15.41-17.91) | 8264   | 40.69 | (39.18-42.22) | 3679 | 22.12 | (20.94-23.36) | 2939 | 20.56 | (19.23-21.96) | 0.116  |
| Female                                                   | 1,595 | 16.43 | (15.19-17.75) | 5082   | 41.78 | (40.16-43.41) | 2371 | 23.37 | (21.92-24.89) | 1720 | 18.42 | (17.11-19.81) |        |
| Age of the household reference person, years             |       |       |               |        |       |               |      |       |               |      |       |               |        |
| ≤ 39                                                     | 1,082 | 13.78 | (12.51-15.16) | 4116   | 39.85 | (37.82-41.92) | 2033 | 22.59 | (20.95-24.32) | 1782 | 23.77 | (21.78-25.89) | <0.001 |
| 40 to 59                                                 | 2,519 | 18.32 | (17.08-19.62) | 7583   | 41.79 | (40.34-43.26) | 3236 | 22.12 | (20.96-23.32) | 2398 | 17.77 | (16.63-18.98) |        |
| ≥ 60                                                     | 497   | 16.34 | (14.06-18.9)  | 1647   | 41.34 | (38.61-44.13) | 781  | 24.68 | (22.28-27.25) | 479  | 17.64 | (15.35-20.19) |        |
| Ethnicity of the household reference person              |       |       |               |        |       |               |      |       |               |      |       |               |        |
| White and yellow                                         | 2,157 | 23.14 | (21.48-24.88) | 3902   | 32.87 | (31.09-34.69) | 2029 | 20.04 | (18.69-21.45) | 2189 | 23.96 | (22.39-25.6)  | <0.001 |
| Black, brown and indigenous                              | 1,932 | 11.65 | (10.77-12.6)  | 9434   | 47.18 | (45.74-48.63) | 4019 | 24.46 | (23.22-25.73) | 2465 | 16.71 | (15.45-18.05) |        |
| Education level of the household reference person, years |       |       |               |        |       |               |      |       |               |      |       |               |        |
| 0-4                                                      | 435   | 7.48  | (6.3-8.86)    | 3763   | 61.42 | (59.17-63.63) | 1157 | 21.82 | (20.13-23.62) | 481  | 9.27  | (8.08-10.63)  | <0.001 |
| 5-9                                                      | 1109  | 12.07 | (10.73-13.55) | 4769   | 45.62 | (43.59-47.66) | 2239 | 25.38 | (23.69-27.16) | 1388 | 16.93 | (15.53-18.43) |        |
| 10-12                                                    | 1,268 | 16.25 | (14.8-17.81)  | 3433   | 35.55 | (33.59-37.55) | 1990 | 25.03 | (23.35-26.79) | 1699 | 23.17 | (21.28-25.18) |        |
| ≥13                                                      | 1,286 | 32.56 | (29.71-35.54) | 1381   | 25.14 | (22.82-27.62) | 664  | 14.28 | (12.51-16.26) | 1091 | 28.02 | (25.28-30.94) |        |

a % considers the sample design of the study

b Obtained from the chi-square test considering the sample design of the study

c Minimum wage equivalent to R \$ 954.00 in 2018

Factor 1 - 'Fruits and vegetables, whole grain foods and cereals' pattern; Factor 2 - 'Brazilian Traditional staple foods' pattern; Factor 3 - 'Brazilian breakfast style' pattern; Factor 4 - 'Beverages, ready-to-eat and convenience foods' pattern

**Figure S1.** Scree plot of eigenvalues from the exploratory factor analysis (EFA) with principal component extraction method (PCF) and Varimax orthogonal rotation.

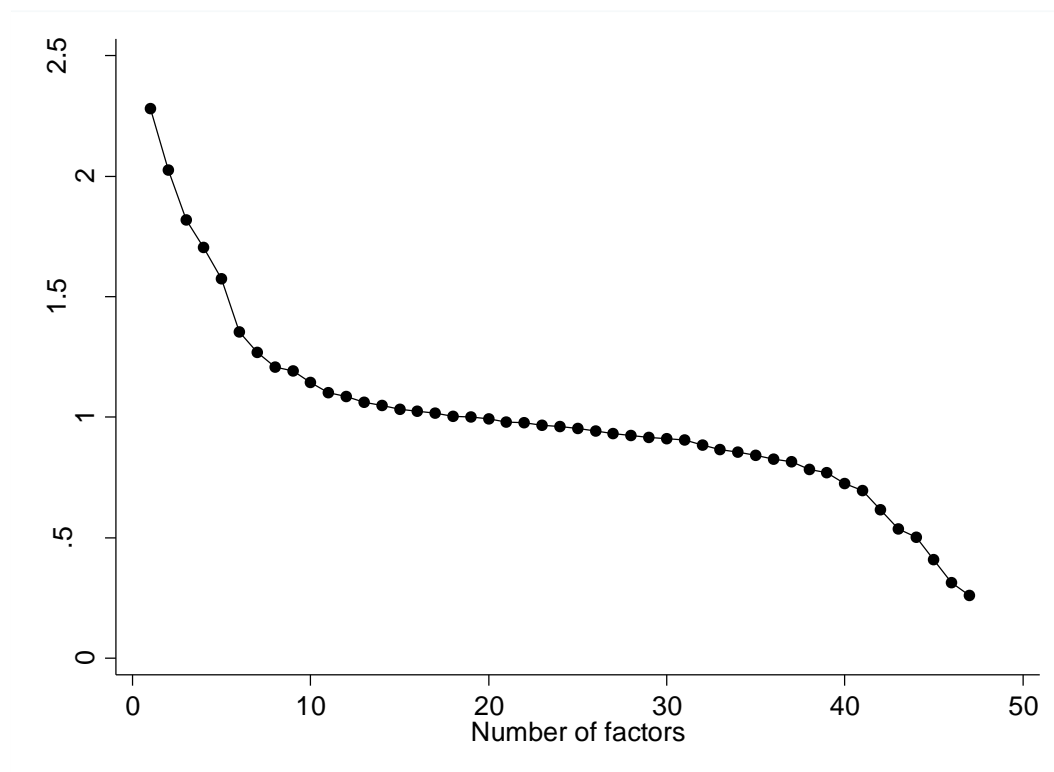

Supplement: s1 [file s1]
